# Supplementary material
Source: publisher figshare collection journal article supplement (https://acs.figshare.com/ndownloader/files/14259923)
Supplement: Supplementary file 1 [file 14259923]

**Supporting Information**

**Electronic States of Acetic Acid in a Binary  
Mixture of Acetic Acid and 1-methylimidazole  
Depend on the Environment**

*Noriko Yoshimura <sup>a, b</sup>, Osamu Takahashi <sup>b, c</sup>, Masaki Oura <sup>b</sup> and Yuka Horikawa <sup>a, b, \*</sup>*

<sup>a</sup> Graduate school of Science and Technology for Innovation, Yamaguchi University, Yamaguchi

753-8512, Japan

<sup>b</sup> RIKEN SPring-8 Center, Soft X-ray Spectroscopy Instrumentation Team, Hyogo 679-5148, Japan

<sup>c</sup> Department of Chemistry, Graduate School of Science, Hiroshima University, Higashi-Hiroshima

739-8526, Japan

## Infrared spectroscopy

Infrared (IR) spectroscopy was also conducted in this research. The measurement of IR spectroscopy was made using FTIR spectrometer (Nicolet is50, Thermo Fisher Scientific Ltd., Japan) at the Center for Instrumental Analysis, Yamaguchi University.

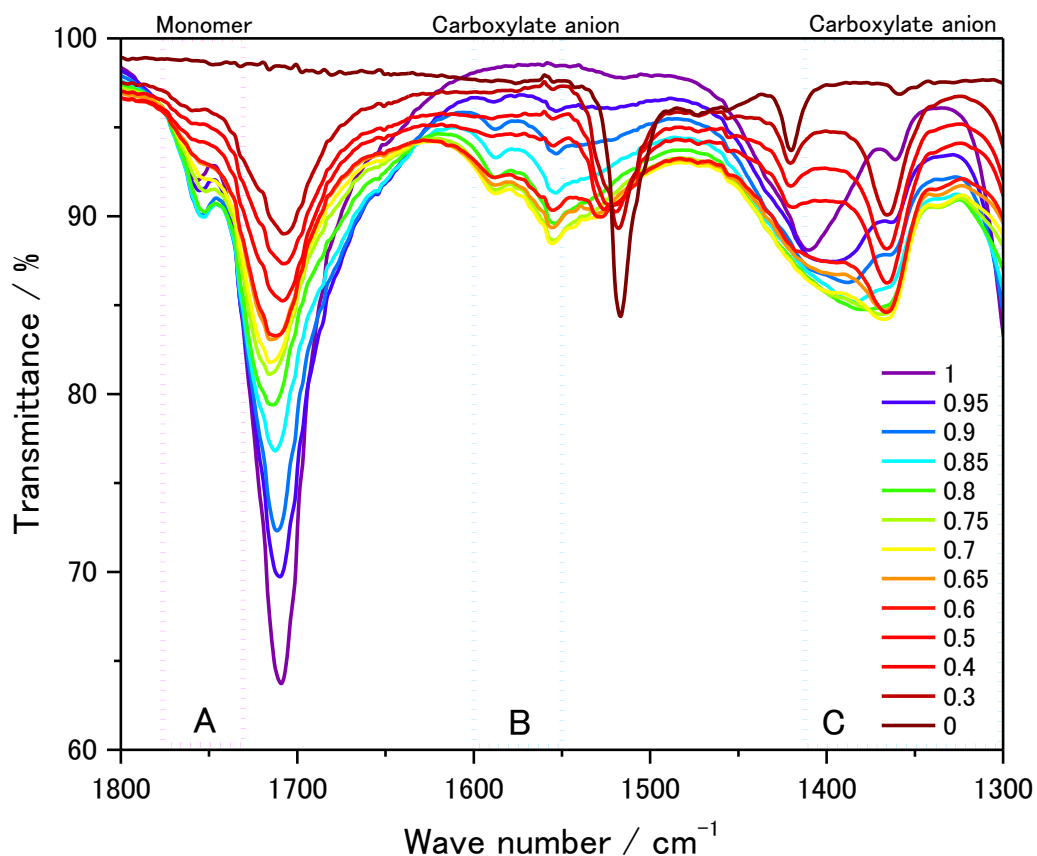

**Figure S1.** Unnormalized IR spectra of acetic acid/1-MI mixture at various concentrations. The figure legends indicate mole fractions of acetic acid ( $\chi_{\text{HOAc}}$ ).

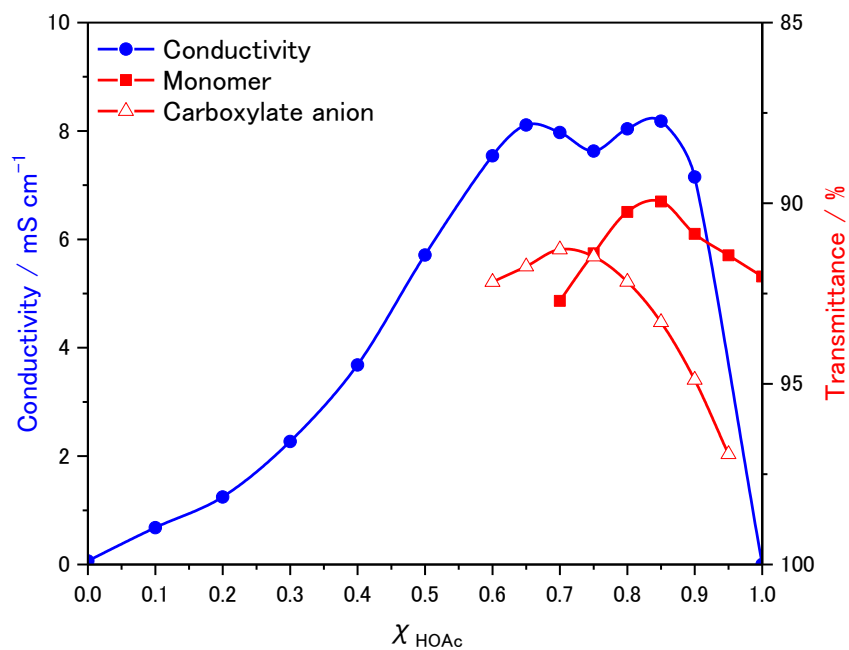

**Figure S2.** Electrical conductivity of acetic acid/1-MI mixture and transmittance intensity around  $1753\text{ cm}^{-1}$ , which is assigned to carboxyl monomer, and around  $1587\text{ cm}^{-1}$ , which is assigned to carboxyl anion.
